# Supplementary material for: Exercise Prevents Weight Gain and Alters the Gut Microbiota in a Mouse Model of High Fat Diet-Induced Obesity
Source: PubMed Central journal article supplement (PMC3966766; doi:10.1371/journal.pone.0092193), 2014-03-26
Supplement: pone.0092193.s005.pdf [file pone.0092193.s005.pdf]

# Data Supplement, Figure S5

A.

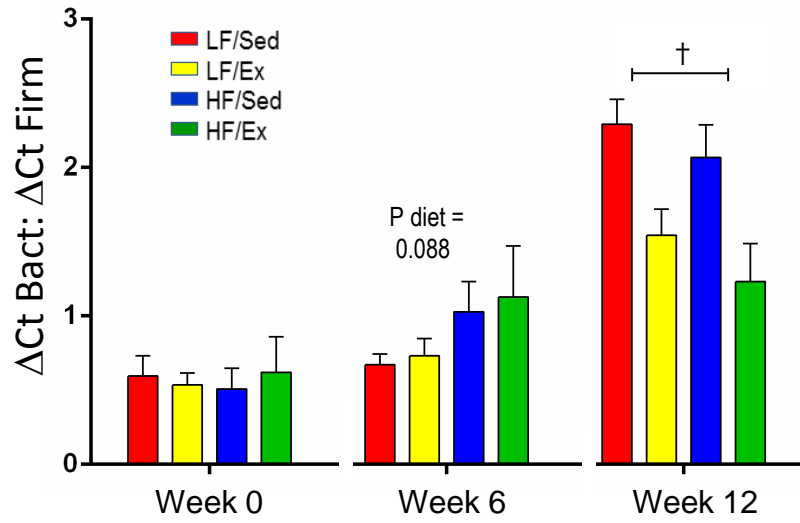

B.

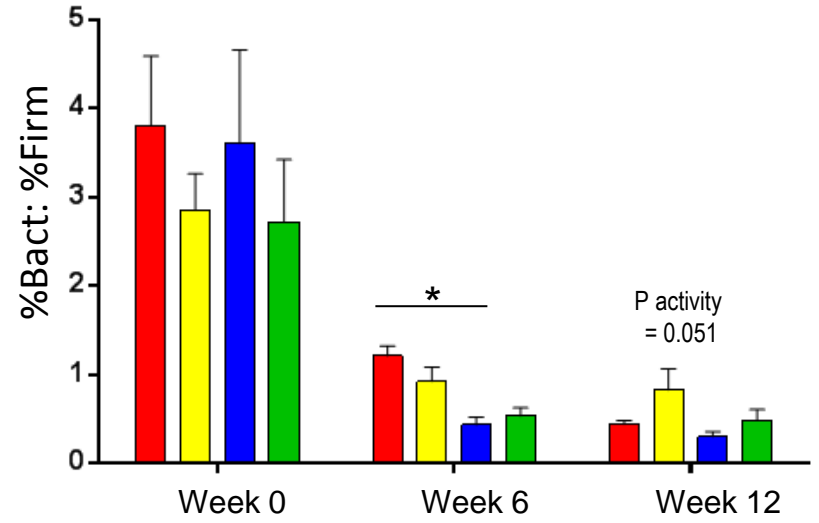

Data supplement- Figure S5. *Changes in the Bacteroidetes:Firmicutes Ratio*

*Determined by qPCR and Sequencing.* A. The ratio of the  $\Delta\text{Ct}$ -Bacteroidetes: $\Delta\text{Ct}$ -

Firmicutes from qPCR at weeks 0, 6 and 12. and B. %-Bacteroidetes: %-Firmicutes

from sequencing at weeks 0, 6 and 12. Data are presented as mean  $\pm$  SEM. Significant

differences are indicated as follows: “\*” P< 0.05 for diet effect, “†” P< 0.05 activity effect

and “‡” P<0.05 diet and activity interaction.
