# Supplementary material for: Exercise Prevents Weight Gain and Alters the Gut Microbiota in a Mouse Model of High Fat Diet-Induced Obesity
Source: PubMed Central journal article supplement (PMC3966766; doi:10.1371/journal.pone.0092193), 2014-03-26
Supplement: pone.0092193.s006.pdf [file pone.0092193.s006.pdf]

---

Data Supplement, Table S1. Primer and probe sets for Bacteroidetes and Firmicutes qPCR

---

| Target                 | Forward primer      | Reverse primer                 | Probe                                   |
|------------------------|---------------------|--------------------------------|-----------------------------------------|
| Bacteroidetes 16S rDNA | AGCAGCCGCGGTAAT     | CTAHGCATTTACCGCTA              | 6FAM-GGGTTTAAAGGG-MGBNFQ                |
| Firmicutes 16S rDNA    | GTCAGCTCGTGTCGTGA   | CCATTGTAKYACGTGTGT             | 6VIC-GTCAANTCATCATGCC-MGBNFQ            |
| Universal 16S rDNA     | TCCTACGGGAGGCAGCAGT | GGACTACCAGGGTATCTAA<br>TCCTGTT | 6FAM-CGTATTACCGCGGCTGCTG<br>GCAC-3TAMRA |

---

The complete sequence for the 3 primer and probe sets used for quantitative polymerase chain reaction (qPCR) assays are shown. The Bacteroidetes and Firmicutes primers were based on the methods of Armougom et al. and the universal primers were based on the methods of Nadkarni et al.
