# Supplementary material for: Exercise Prevents Weight Gain and Alters the Gut Microbiota in a Mouse Model of High Fat Diet-Induced Obesity
Source: PubMed Central journal article supplement (PMC3966766; doi:10.1371/journal.pone.0092193), 2014-03-26
Supplement: pone.0092193.s007.pdf [file pone.0092193.s007.pdf]

Data Supplement, Table S2. Effect of diet and exercise on bacterial families with total contributions between 0% and 1.25%

| Phyla         | Class       | Order             | Family             | LF/Sed                 | LF/Ex                    | HF/Sed                   | HF/Ex                  | Notes                                                                         |
|---------------|-------------|-------------------|--------------------|------------------------|--------------------------|--------------------------|------------------------|-------------------------------------------------------------------------------|
| Firmicutes    | Other       | Other             | Other              | A                      | A                        | S<br>(5/6)<br>ND: 11     | S<br>(5/6)<br>ND: 16   | Sed > Ex <sup>a</sup>                                                         |
| Firmicutes    | Clostridia  | Clostridiales     | Other              | A                      | S<br>(5/6)<br>ND: 14     | A                        | A                      | NS                                                                            |
| Firmicutes    | Clostridia  | Clostridiales     | Peptococcaceae     | N                      | N                        | S<br>(1/6)<br>D: 23      | S<br>(1/6)<br>D: 24    | NS<br>Litter F: 23 & 24                                                       |
| Firmicutes    | Clostridia  | Clostridiales     | Dehalobacteriaceae | S<br>(1/6)<br>D: 1     | S<br>(2/6)<br>D: 2,14    | S<br>(5/6)<br>ND: 3      | S<br>(4/6)<br>ND: 4,16 | LF < HF <sup>b</sup><br>Litter A: 1, 2, 3 & 4<br>Litter D: 14 & 16            |
| Firmicutes    | Clostridia  | Coriobacteriales  | Coriobacteriaceae  | A                      | A                        | A                        | A                      | LF < HF <sup>c</sup>                                                          |
| Firmicutes    | Bacilli     | Other             | Other              | S<br>(4/6)<br>ND: 9,13 | S<br>(4/6)<br>ND: 2,10   | A                        | N                      | LF/Ex > HF/Ex <sup>d</sup><br>HF/Sed > HF/Ex <sup>d</sup><br>Litter C: 9 & 10 |
| Firmicutes    | Bacilli     | Lactobacillales   | Other              | N                      | S<br>(1/6)<br>D: 18      | S<br>(3/6)<br>D: 3,11,15 | N                      | LF/Sed < HF/Sed <sup>e</sup><br>HF/Sed > HF/Ex <sup>e</sup>                   |
| Firmicutes    | Bacilli     | Lactobacillales   | Enterococcaceae    | N                      | N                        | S<br>(2/6)<br>D: 19,23   | S<br>(1/6)<br>D: 20    | NS<br>Litter E: 19 & 20                                                       |
| Tenericutes   | Mollicutes  | Anaeroplasmatales | Anaeroplasmataceae | N                      | S<br>(3/6)<br>D: 2,10,14 | N                        | N                      | NS                                                                            |
| Bacteroidetes | Bacteroidia | Bacteroidales     | [Odoribacteraceae] | N                      | S<br>(2/6)<br>D: 6,18    | N                        | S<br>(1/6)<br>D: 12    | NS                                                                            |

Within a diet and exercise group, some bacteria were detected in all six mice (A: always), some bacteria were not detected in any mice (N: Never), and other bacteria were detected in 1-5 mice in the group (S: Sometimes). For S, the number of mice in which the bacterium was either detected (D) or not detected (ND) is indicated as a fraction ("\*/6"). The identifying number for each mouse is also denoted below. The mouse litters were as follows: Litter A: mice #1-4, Litter B: mice #5-8, Litter C: mice #9-12, Litter D: mice #13-16, Litter E: mice #17-20, and Litter F: mice #21-24. Assignment of mice to treatment groups were as follows: LF/Sed: mice #1, 5, 9, 13, 17, 21; LF/Ex: mice #2, 6, 10, 14, 18, 22; HF/Sed: mice #3, 7, 11, 15, 19, 23; HF/Ex: mice #4, 8, 12, 16, 20, 24. NS: not significant by 2-way ANOVA; <sup>a</sup>Main effect exercise F(1,20)=7.118, P=0.015; <sup>b</sup>Main effect diet F(1,20)=6.923, P=0.016; <sup>c</sup>Main effect diet F(1,20)=17.361, P<0.001; <sup>d</sup>Interaction F(1,20)=7.313, P=0.014; <sup>e</sup>Interaction F(1,20)=4.623, P=0.044.
