# Supplementary material for: Exercise Prevents Weight Gain and Alters the Gut Microbiota in a Mouse Model of High Fat Diet-Induced Obesity
Source: PubMed Central journal article supplement (PMC3966766; doi:10.1371/journal.pone.0092193), 2014-03-26
Supplement: pone.0092193.s008.pdf [file pone.0092193.s008.pdf]

## Supplementary Text S1: Commands used in the analysis of the sequencing dataset

| #SampleID  | BarcodeSequence  | LinkerPrimerSequence  | Mouse       | Sort                | Diet    | Lifestyle | Litter  | Week   | Diet.LifeStyle    | Diet.Litter | Diet.Week   |
|------------|------------------|-----------------------|-------------|---------------------|---------|-----------|---------|--------|-------------------|-------------|-------------|
|            | LifeStyle.Litter | LifeStyle.Week        | Litter.Week | Diet.LifeStyle.Week | shannon | initialwt | finalwt | fatpad | DistRun           | OGTT        | Description |
| Evans.1.1  | GGAATTATCGGT     | CCGGACTACHVGGGTWCTAAT | 1           | 1                   | LowFat  | Sedentary | A       | 1      | LowFat.Sedentary  | LowFat.A    | LowFat.1    |
|            | Sedentary.A      | Sedentary.1           | A.1         | LowFat.Sedentary.1  | 4.415   | 18.2      | 28.5    | 0.925  | NA                | 22328       | Evans.1.1   |
| Evans.1.5  | GGCAAATACACT     | CCGGACTACHVGGGTWCTAAT | 5           | 2                   | LowFat  | Sedentary | B       | 1      | LowFat.Sedentary  | LowFat.B    | LowFat.1    |
|            | Sedentary.B      | Sedentary.1           | B.1         | LowFat.Sedentary.1  | 3.929   | 19.1      | 28.2    | 0.744  | NA                | 20400       | Evans.1.5   |
| Evans.1.9  | GCTTAGATGTAG     | CCGGACTACHVGGGTWCTAAT | 9           | 3                   | LowFat  | Sedentary | C       | 1      | LowFat.Sedentary  | LowFat.C    | LowFat.1    |
|            | Sedentary.C      | Sedentary.1           | C.1         | LowFat.Sedentary.1  | 4.155   | 16.1      | 25.2    | 0.576  | NA                | 22575       | Evans.1.9   |
| Evans.1.13 | CTCTCTCACTTG     | CCGGACTACHVGGGTWCTAAT | 13          | 4                   | LowFat  | Sedentary | D       | 1      | LowFat.Sedentary  | LowFat.D    | LowFat.1    |
|            | Sedentary.D      | Sedentary.1           | D.1         | LowFat.Sedentary.1  | 3.505   | 18.7      | 27.6    | 0.824  | NA                | 25898       | Evans.1.13  |
| Evans.1.17 | CTAGGATCACTG     | CCGGACTACHVGGGTWCTAAT | 17          | 5                   | LowFat  | Sedentary | E       | 1      | LowFat.Sedentary  | LowFat.E    | LowFat.1    |
|            | Sedentary.E      | Sedentary.1           | E.1         | LowFat.Sedentary.1  | 4.228   | 17.7      | 26.2    | 0.489  | NA                | 18818       | Evans.1.17  |
| Evans.1.21 | CAATCGGCTTGC     | CCGGACTACHVGGGTWCTAAT | 21          | 6                   | LowFat  | Sedentary | F       | 1      | LowFat.Sedentary  | LowFat.F    | LowFat.1    |
|            | Sedentary.F      | Sedentary.1           | F.1         | LowFat.Sedentary.1  | 5.07    | 18.5      | 26.9    | 0.486  | NA                | 17880       | Evans.1.21  |
| Evans.1.2  | CATCAAGCATAG     | CCGGACTACHVGGGTWCTAAT | 2           | 7                   | LowFat  | Exercised | A       | 1      | LowFat.Exercised  | LowFat.A    | LowFat.1    |
|            | Exercised.A      | Exercised.1           | A.1         | LowFat.Exercised.1  | 4.723   | 17.9      | 26      | NA     | 1046              | 19313       | Evans.1.2   |
| Evans.1.6  | GTCATGCTCCAG     | CCGGACTACHVGGGTWCTAAT | 6           | 8                   | LowFat  | Exercised | B       | 1      | LowFat.Exercised  | LowFat.B    | LowFat.1    |
|            | Exercised.B      | Exercised.1           | B.1         | LowFat.Exercised.1  | 4.237   | 19        | 24.9    | 0.485  | 1056              | 18188       | Evans.1.6   |
| Evans.1.10 | AAGACGTAGCGG     | CCGGACTACHVGGGTWCTAAT | 10          | 9                   | LowFat  | Exercised | C       | 1      | LowFat.Exercised  | LowFat.C    | LowFat.1    |
|            | Exercised.C      | Exercised.1           | C.1         | LowFat.Exercised.1  | 4.047   | 18.4      | 25.8    | 0.333  | 976.7             | 29040       | Evans.1.10  |
| Evans.1.14 | ATTGCAAGCAAC     | CCGGACTACHVGGGTWCTAAT | 14          | 10                  | LowFat  | Exercised | D       | 1      | LowFat.Exercised  | LowFat.D    | LowFat.1    |
|            | Exercised.D      | Exercised.1           | D.1         | LowFat.Exercised.1  | 3.764   | 18.2      | 24.7    | 0.578  | 1406.8            | 18900       | Evans.1.14  |
| Evans.1.18 | GATGACCCAAAT     | CCGGACTACHVGGGTWCTAAT | 18          | 11                  | LowFat  | Exercised | E       | 1      | LowFat.Exercised  | LowFat.E    | LowFat.1    |
|            | Exercised.E      | Exercised.1           | E.1         | LowFat.Exercised.1  | 4.755   | 19        | 25.6    | 0.539  | 1119.899          | 23865       | Evans.1.18  |
| Evans.1.22 | AACACTCGATCG     | CCGGACTACHVGGGTWCTAAT | 22          | 12                  | LowFat  | Exercised | F       | 1      | LowFat.Exercised  | LowFat.F    | LowFat.1    |
|            | Exercised.F      | Exercised.1           | F.1         | LowFat.Exercised.1  | 4.54    | 17.2      | 25      | 0.436  | 1145.76           | 19283       | Evans.1.22  |
| Evans.1.3  | CATCGCGTTGAC     | CCGGACTACHVGGGTWCTAAT | 3           | 13                  | HighFat | Sedentary | A       | 1      | HighFat.Sedentary | HighFat.A   | HighFat.1   |
|            | Sedentary.A      | Sedentary.1           | A.1         | HighFat.Sedentary.1 | 4.212   | 18.9      | 35      | 1.708  | NA                | 29820       | Evans.1.3   |
| Evans.1.7  | CCTAGTAAGCTG     | CCGGACTACHVGGGTWCTAAT | 7           | 14                  | HighFat | Sedentary | B       | 1      | HighFat.Sedentary | HighFat.B   | HighFat.1   |
|            | Sedentary.B      | Sedentary.1           | B.1         | HighFat.Sedentary.1 | 3.671   | 18.3      | 28.7    | 0.913  | NA                | 33248       | Evans.1.7   |
| Evans.1.11 | TTACCTTACACC     | CCGGACTACHVGGGTWCTAAT | 11          | 15                  | HighFat | Sedentary | C       | 1      | HighFat.Sedentary | HighFat.C   | HighFat.1   |
|            | Sedentary.C      | Sedentary.1           | C.1         | HighFat.Sedentary.1 | 4.417   | 16.6      | 31      | 1.291  | NA                | 27038       | Evans.1.11  |
| Evans.1.15 | CACGTGACATGT     | CCGGACTACHVGGGTWCTAAT | 15          | 16                  | HighFat | Sedentary | D       | 1      | HighFat.Sedentary | HighFat.D   | HighFat.1   |
|            | Sedentary.D      | Sedentary.1           | D.1         | HighFat.Sedentary.1 | 4.095   | 17.9      | 36.7    | 2.608  | NA                | 36855       | Evans.1.15  |
| Evans.1.19 | ACCGGAGTAGGA     | CCGGACTACHVGGGTWCTAAT | 19          | 17                  | HighFat | Sedentary | E       | 1      | HighFat.Sedentary | HighFat.E   | HighFat.1   |
|            | Sedentary.E      | Sedentary.1           | E.1         | HighFat.Sedentary.1 | 4.728   | 17        | 32.7    | 1.413  | NA                | 34628       | Evans.1.19  |
| Evans.1.23 | TGACCCGGCTGTT    | CCGGACTACHVGGGTWCTAAT | 23          | 18                  | HighFat | Sedentary | F       | 1      | HighFat.Sedentary | HighFat.F   | HighFat.1   |
|            | Sedentary.F      | Sedentary.1           | F.1         | HighFat.Sedentary.1 | 4.205   | 18.7      | 34.3    | 2.436  | NA                | 33615       | Evans.1.23  |
| Evans.1.4  | GCACATAGTCGT     | CCGGACTACHVGGGTWCTAAT | 4           | 19                  | HighFat | Exercised | A       | 1      | HighFat.Exercised | HighFat.A   | HighFat.1   |
|            | Exercised.A      | Exercised.1           | A.1         | HighFat.Exercised.1 | 4.526   | 17.6      | 24.4    | 0.505  | 685.6             | 21825       | Evans.1.4   |
| Evans.1.8  | TTACCGACGAGT     | CCGGACTACHVGGGTWCTAAT | 8           | 20                  | HighFat | Exercised | B       | 1      | HighFat.Exercised | HighFat.B   | HighFat.1   |
|            | Exercised.B      | Exercised.1           | B.1         | HighFat.Exercised.1 | 4.269   | 18.5      | 27.4    | 0.471  | 2482              | 25043       | Evans.1.8   |
| Evans.1.12 | TGACTAATGGCC     | CCGGACTACHVGGGTWCTAAT | 12          | 21                  | HighFat | Exercised | C       | 1      | HighFat.Exercised | HighFat.C   | HighFat.1   |
|            | Exercised.C      | Exercised.1           | C.1         | HighFat.Exercised.1 | 4.896   | 17.6      | 26      | 0.599  | 1221.6            | 16200       | Evans.1.12  |
| Evans.1.16 | CACAGTTGAAGT     | CCGGACTACHVGGGTWCTAAT | 16          | 22                  | HighFat | Exercised | D       | 1      | HighFat.Exercised | HighFat.D   | HighFat.1   |
|            | Exercised.D      | Exercised.1           | D.1         | HighFat.Exercised.1 | 3.074   | 18.5      | 33.7    | 1.906  | 671.4             | 34845       | Evans.1.16  |
| Evans.1.20 | TGAGGACTACCT     | CCGGACTACHVGGGTWCTAAT | 20          | 23                  | HighFat | Exercised | E       | 1      | HighFat.Exercised | HighFat.E   | HighFat.1   |
|            | Exercised.E      | Exercised.1           | E.1         | HighFat.Exercised.1 | 4.643   | 16.8      | 27.2    | 0.704  | 2118.39           | 22433       | Evans.1.20  |
| Evans.1.24 | GGAGGAGCAATA     | CCGGACTACHVGGGTWCTAAT | 24          | 24                  | HighFat | Exercised | F       | 1      | HighFat.Exercised | HighFat.F   | HighFat.1   |
|            | Exercised.F      | Exercised.1           | F.1         | HighFat.Exercised.1 | 5.152   | 18.1      | 28.6    | 0.918  | 1197.7            | 24525       | Evans.1.24  |
| Evans.7.1  | AGCGACGAAGAC     | CCGGACTACHVGGGTWCTAAT | 1           | 25                  | LowFat  | Sedentary | A       | 7      | LowFat.Sedentary  | LowFat.A    | LowFat.7    |
|            | Sedentary.A      | Sedentary.7           | A.7         | LowFat.Sedentary.7  | 4.588   | 18.2      | 28.5    | 0.925  | NA                | 22328       | Evans.7.1   |
| Evans.7.5  | TTGGATTGAACG     | CCGGACTACHVGGGTWCTAAT | 5           | 26                  | LowFat  | Sedentary | B       | 7      | LowFat.Sedentary  | LowFat.B    | LowFat.7    |
|            | Sedentary.B      | Sedentary.7           | B.7         | LowFat.Sedentary.7  | 4.6     | 19.1      | 28.2    | 0.744  | NA                | 20400       | Evans.7.5   |
| Evans.7.9  | TACAGTTACGCG     | CCGGACTACHVGGGTWCTAAT | 9           | 27                  | LowFat  | Sedentary | C       | 7      | LowFat.Sedentary  | LowFat.C    | LowFat.7    |
|            | Sedentary.C      | Sedentary.7           | C.7         | LowFat.Sedentary.7  | 5.085   | 16.1      | 25.2    | 0.576  | NA                | 22575       | Evans.7.9   |
| Evans.7.13 | CTTCGACTTTCC     | CCGGACTACHVGGGTWCTAAT | 13          | 28                  | LowFat  | Sedentary | D       | 7      | LowFat.Sedentary  | LowFat.D    | LowFat.7    |
|            | Sedentary.D      | Sedentary.7           | D.7         | LowFat.Sedentary.7  | 4.5     | 18.7      | 27.6    | 0.824  | NA                | 25898       | Evans.7.13  |

|             |              |                           |      |                     |           |      |      |                   |           |           |             |
|-------------|--------------|---------------------------|------|---------------------|-----------|------|------|-------------------|-----------|-----------|-------------|
| Evans.7.17  | CCTCTGAGAGCT | CCGGACTACHVGGGTWTCTAAT 17 | 29   | LowFat              | Sedentary | E    | 7    | LowFat.Sedentary  | LowFat.E  | LowFat.7  |             |
|             | Sedentary.E  | Sedentary.7               | E.7  | LowFat.Sedentary.7  | 4.38      | 17.7 | 26.2 | 0.489             | NA        | 18818     | Evans.7.17  |
| Evans.7.21  | CGGCCTAAGTTC | CCGGACTACHVGGGTWTCTAAT 21 | 30   | LowFat              | Sedentary | F    | 7    | LowFat.Sedentary  | LowFat.F  | LowFat.7  |             |
|             | Sedentary.F  | Sedentary.7               | F.7  | LowFat.Sedentary.7  | 4.639     | 18.5 | 26.9 | 0.486             | NA        | 17880     | Evans.7.21  |
| Evans.7.2   | CTTCCCTAACTC | CCGGACTACHVGGGTWTCTAAT 2  | 31   | LowFat              | Exercised | A    | 7    | LowFat.Exercised  | LowFat.A  | LowFat.7  |             |
|             | Exercised.A  | Exercised.7               | A.7  | LowFat.Exercised.7  | 4.644     | 17.9 | 26   | NA                | 1046      | 19313     | Evans.7.2   |
| Evans.7.6   | GATATACCAGTG | CCGGACTACHVGGGTWTCTAAT 6  | 32   | LowFat              | Exercised | B    | 7    | LowFat.Exercised  | LowFat.B  | LowFat.7  |             |
|             | Exercised.B  | Exercised.7               | B.7  | LowFat.Exercised.7  | 4.347     | 19   | 24.9 | 0.485             | 1056      | 18188     | Evans.7.6   |
| Evans.7.10  | CAAGCCCTAGTA | CCGGACTACHVGGGTWTCTAAT 10 | 33   | LowFat              | Exercised | C    | 7    | LowFat.Exercised  | LowFat.C  | LowFat.7  |             |
|             | Exercised.C  | Exercised.7               | C.7  | LowFat.Exercised.7  | 4.973     | 18.4 | 25.8 | 0.333             | 976.7     | 29040     | Evans.7.10  |
| Evans.7.14  | GTCATAAGAACC | CCGGACTACHVGGGTWTCTAAT 14 | 34   | LowFat              | Exercised | D    | 7    | LowFat.Exercised  | LowFat.D  | LowFat.7  |             |
|             | Exercised.D  | Exercised.7               | D.7  | LowFat.Exercised.7  | 4.031     | 18.2 | 24.7 | 0.578             | 1406.8    | 18900     | Evans.7.14  |
| Evans.7.18  | CCTCGATGCAGT | CCGGACTACHVGGGTWTCTAAT 18 | 35   | LowFat              | Exercised | E    | 7    | LowFat.Exercised  | LowFat.E  | LowFat.7  |             |
|             | Exercised.E  | Exercised.7               | E.7  | LowFat.Exercised.7  | 4.543     | 19   | 25.6 | 0.539             | 1119.899  | 23865     | Evans.7.18  |
| Evans.7.22  | AGCGCTCACATC | CCGGACTACHVGGGTWTCTAAT 22 | 36   | LowFat              | Exercised | F    | 7    | LowFat.Exercised  | LowFat.F  | LowFat.7  |             |
|             | Exercised.F  | Exercised.7               | F.7  | LowFat.Exercised.7  | 4.808     | 17.2 | 25   | 0.436             | 1145.76   | 19283     | Evans.7.22  |
| Evans.7.3   | TGGAAGAACGGC | CCGGACTACHVGGGTWTCTAAT 3  | 37   | HighFat             | Sedentary | A    | 7    | HighFat.Sedentary | HighFat.A | HighFat.7 |             |
|             | Sedentary.A  | Sedentary.7               | A.7  | HighFat.Sedentary.7 | 5.294     | 18.9 | 35   | 1.708             | NA        | 29820     | Evans.7.3   |
| Evans.7.7   | AACAAACTGCCA | CCGGACTACHVGGGTWTCTAAT 7  | 38   | HighFat             | Sedentary | B    | 7    | HighFat.Sedentary | HighFat.B | HighFat.7 |             |
|             | Sedentary.B  | Sedentary.7               | B.7  | HighFat.Sedentary.7 | 4.906     | 18.3 | 28.7 | 0.913             | NA        | 33248     | Evans.7.7   |
| Evans.7.11  | CTGAGCTCTGCA | CCGGACTACHVGGGTWTCTAAT 11 | 39   | HighFat             | Sedentary | C    | 7    | HighFat.Sedentary | HighFat.C | HighFat.7 |             |
|             | Sedentary.C  | Sedentary.7               | C.7  | HighFat.Sedentary.7 | 5.932     | 16.6 | 31   | 1.291             | NA        | 27038     | Evans.7.11  |
| Evans.7.15  | GTCCGCAAGTTA | CCGGACTACHVGGGTWTCTAAT 15 | 40   | HighFat             | Sedentary | D    | 7    | HighFat.Sedentary | HighFat.D | HighFat.7 |             |
|             | Sedentary.D  | Sedentary.7               | D.7  | HighFat.Sedentary.7 | 4.877     | 17.9 | 36.7 | 2.608             | NA        | 36855     | Evans.7.15  |
| Evans.7.19  | GCGGACTATTCA | CCGGACTACHVGGGTWTCTAAT 19 | 41   | HighFat             | Sedentary | E    | 7    | HighFat.Sedentary | HighFat.E | HighFat.7 |             |
|             | Sedentary.E  | Sedentary.7               | E.7  | HighFat.Sedentary.7 | 4.646     | 17   | 32.7 | 1.413             | NA        | 34628     | Evans.7.19  |
| Evans.7.23  | TGGTTATGGCAC | CCGGACTACHVGGGTWTCTAAT 23 | 42   | HighFat             | Sedentary | F    | 7    | HighFat.Sedentary | HighFat.F | HighFat.7 |             |
|             | Sedentary.F  | Sedentary.7               | F.7  | HighFat.Sedentary.7 | 5.931     | 18.7 | 34.3 | 2.436             | NA        | 33615     | Evans.7.23  |
| Evans.7.4   | GCTAGACACTAC | CCGGACTACHVGGGTWTCTAAT 4  | 43   | HighFat             | Exercised | A    | 7    | HighFat.Exercised | HighFat.A | HighFat.7 |             |
|             | Exercised.A  | Exercised.7               | A.7  | HighFat.Exercised.7 | 5.556     | 17.6 | 24.4 | 0.505             | 685.6     | 21825     | Evans.7.4   |
| Evans.7.8   | GTAGACATGTGT | CCGGACTACHVGGGTWTCTAAT 8  | 44   | HighFat             | Exercised | B    | 7    | HighFat.Exercised | HighFat.B | HighFat.7 |             |
|             | Exercised.B  | Exercised.7               | B.7  | HighFat.Exercised.7 | 5.403     | 18.5 | 27.4 | 0.471             | 2482      | 25043     | Evans.7.8   |
| Evans.7.12  | TAGTGTCCGATC | CCGGACTACHVGGGTWTCTAAT 12 | 45   | HighFat             | Exercised | C    | 7    | HighFat.Exercised | HighFat.C | HighFat.7 |             |
|             | Exercised.C  | Exercised.7               | C.7  | HighFat.Exercised.7 | 5.074     | 17.6 | 26   | 0.599             | 1221.6    | 16200     | Evans.7.12  |
| Evans.7.16  | CGTAGAGCTCTC | CCGGACTACHVGGGTWTCTAAT 16 | 46   | HighFat             | Exercised | D    | 7    | HighFat.Exercised | HighFat.D | HighFat.7 |             |
|             | Exercised.D  | Exercised.7               | D.7  | HighFat.Exercised.7 | 5.029     | 18.5 | 33.7 | 1.906             | 671.4     | 34845     | Evans.7.16  |
| Evans.7.20  | CGTGACAAATTG | CCGGACTACHVGGGTWTCTAAT 20 | 47   | HighFat             | Exercised | E    | 7    | HighFat.Exercised | HighFat.E | HighFat.7 |             |
|             | Exercised.E  | Exercised.7               | E.7  | HighFat.Exercised.7 | 5.735     | 16.8 | 27.2 | 0.704             | 2118.39   | 22433     | Evans.7.20  |
| Evans.7.24  | CGAGGTTCTGAT | CCGGACTACHVGGGTWTCTAAT 24 | 48   | HighFat             | Exercised | F    | 7    | HighFat.Exercised | HighFat.F | HighFat.7 |             |
|             | Exercised.F  | Exercised.7               | F.7  | HighFat.Exercised.7 | 5.289     | 18.1 | 28.6 | 0.918             | 1197.7    | 24525     | Evans.7.24  |
| Evans.12.1  | AACTCCTGTGGA | CCGGACTACHVGGGTWTCTAAT 1  | 49   | LowFat              | Sedentary | A    | 12   | LowFat.Sedentary  | LowFat.A  | LowFat.12 |             |
|             | Sedentary.A  | Sedentary.12              | A.12 | LowFat.Sedentary.12 | 4.306     | 18.2 | 28.5 | 0.925             | NA        | 22328     | Evans.12.1  |
| Evans.12.5  | ATGGCCTGACTA | CCGGACTACHVGGGTWTCTAAT 5  | 50   | LowFat              | Sedentary | B    | 12   | LowFat.Sedentary  | LowFat.B  | LowFat.12 |             |
|             | Sedentary.B  | Sedentary.12              | B.12 | LowFat.Sedentary.12 | 3.995     | 19.1 | 28.2 | 0.744             | NA        | 20400     | Evans.12.5  |
| Evans.12.9  | TAGCGGAACCTT | CCGGACTACHVGGGTWTCTAAT 9  | 51   | LowFat              | Sedentary | C    | 12   | LowFat.Sedentary  | LowFat.C  | LowFat.12 |             |
|             | Sedentary.C  | Sedentary.12              | C.12 | LowFat.Sedentary.12 | 4.45      | 16.1 | 25.2 | 0.576             | NA        | 22575     | Evans.12.9  |
| Evans.12.13 | CCACCAGTAAC  | CCGGACTACHVGGGTWTCTAAT 13 | 52   | LowFat              | Sedentary | D    | 12   | LowFat.Sedentary  | LowFat.D  | LowFat.12 |             |
|             | Sedentary.D  | Sedentary.12              | D.12 | LowFat.Sedentary.12 | 4.128     | 18.7 | 27.6 | 0.824             | NA        | 25898     | Evans.12.13 |
| Evans.12.17 | AGCAGGCACGAA | CCGGACTACHVGGGTWTCTAAT 17 | 53   | LowFat              | Sedentary | E    | 12   | LowFat.Sedentary  | LowFat.E  | LowFat.12 |             |
|             | Sedentary.E  | Sedentary.12              | E.12 | LowFat.Sedentary.12 | 3.886     | 17.7 | 26.2 | 0.489             | NA        | 18818     | Evans.12.17 |
| Evans.12.21 | TCGAGCCGATCT | CCGGACTACHVGGGTWTCTAAT 21 | 54   | LowFat              | Sedentary | F    | 12   | LowFat.Sedentary  | LowFat.F  | LowFat.12 |             |
|             | Sedentary.F  | Sedentary.12              | F.12 | LowFat.Sedentary.12 | 4.037     | 18.5 | 26.9 | 0.486             | NA        | 17880     | Evans.12.21 |
| Evans.12.2  | TAATGGTCGTAG | CCGGACTACHVGGGTWTCTAAT 2  | 55   | LowFat              | Exercised | A    | 12   | LowFat.Exercised  | LowFat.A  | LowFat.12 |             |
|             | Exercised.A  | Exercised.12              | A.12 | LowFat.Exercised.12 | 4.428     | 17.9 | 26   | NA                | 1046      | 19313     | Evans.12.2  |
| Evans.12.6  | ACGCACATACAA | CCGGACTACHVGGGTWTCTAAT 6  | 56   | LowFat              | Exercised | B    | 12   | LowFat.Exercised  | LowFat.B  | LowFat.12 |             |
|             | Exercised.B  | Exercised.12              | B.12 | LowFat.Exercised.12 | 3.817     | 19   | 24.9 | 0.485             | 1056      | 18188     | Evans.12.6  |
| Evans.12.10 | CATACACGCACC | CCGGACTACHVGGGTWTCTAAT 10 | 57   | LowFat              | Exercised | C    | 12   | LowFat.Exercised  | LowFat.C  | LowFat.12 |             |
|             | Exercised.C  | Exercised.12              | C.12 | LowFat.Exercised.12 | 3.805     | 18.4 | 25.8 | 0.333             | 976.7     | 29040     | Evans.12.10 |
| Evans.12.14 | ATATCGCGATGA | CCGGACTACHVGGGTWTCTAAT 14 | 58   | LowFat              | Exercised | D    | 12   | LowFat.Exercised  | LowFat.D  | LowFat.12 |             |
|             | Exercised.D  | Exercised.12              | D.12 | LowFat.Exercised.12 | 4.482     | 18.2 | 24.7 | 0.578             | 1406.8    | 18900     | Evans.12.14 |
| Evans.12.18 | TACGCAGCACTA | CCGGACTACHVGGGTWTCTAAT 18 | 59   | LowFat              | Exercised | E    | 12   | LowFat.Exercised  | LowFat.E  | LowFat.12 |             |
|             | Exercised.E  | Exercised.12              | E.12 | LowFat.Exercised.12 | 4.63      | 19   | 25.6 | 0.539             | 1119.899  | 23865     | Evans.12.18 |

|             |               |                        |      |                      |         |           |      |       |                   |           |             |
|-------------|---------------|------------------------|------|----------------------|---------|-----------|------|-------|-------------------|-----------|-------------|
| Evans.12.22 | CTCATCATGTTC  | CCGGACTACHVGGGTWTCTAAT | 22   | 60                   | LowFat  | Exercised | F    | 12    | LowFat.Exercised  | LowFat.F  | LowFat.12   |
|             | Exercised.F   | Exercised.12           | F.12 | LowFat.Exercised.12  | 3.894   | 17.2      | 25   | 0.436 | 1145.76           | 19283     | Evans.12.22 |
| Evans.12.3  | TTGCACCGTTCGA | CCGGACTACHVGGGTWTCTAAT | 3    | 61                   | HighFat | Sedentary | A    | 12    | HighFat.Sedentary | HighFat.A | HighFat.12  |
|             | Sedentary.A   | Sedentary.12           | A.12 | HighFat.Sedentary.12 | 3.73    | 18.9      | 35   | 1.708 | NA                | 29820     | Evans.12.3  |
| Evans.12.7  | TGAGTGGTCTGT  | CCGGACTACHVGGGTWTCTAAT | 7    | 62                   | HighFat | Sedentary | B    | 12    | HighFat.Sedentary | HighFat.B | HighFat.12  |
|             | Sedentary.B   | Sedentary.12           | B.12 | HighFat.Sedentary.12 | 4.649   | 18.3      | 28.7 | 0.913 | NA                | 33248     | Evans.12.7  |
| Evans.12.11 | ACCTCAGTCAAG  | CCGGACTACHVGGGTWTCTAAT | 11   | 63                   | HighFat | Sedentary | C    | 12    | HighFat.Sedentary | HighFat.C | HighFat.12  |
|             | Sedentary.C   | Sedentary.12           | C.12 | HighFat.Sedentary.12 | 4.845   | 16.6      | 31   | 1.291 | NA                | 27038     | Evans.12.11 |
| Evans.12.15 | CGCCGGTAATCT  | CCGGACTACHVGGGTWTCTAAT | 15   | 64                   | HighFat | Sedentary | D    | 12    | HighFat.Sedentary | HighFat.D | HighFat.12  |
|             | Sedentary.D   | Sedentary.12           | D.12 | HighFat.Sedentary.12 | 4.936   | 17.9      | 36.7 | 2.608 | NA                | 36855     | Evans.12.15 |
| Evans.12.19 | CGCTTAGTGCTG  | CCGGACTACHVGGGTWTCTAAT | 19   | 65                   | HighFat | Sedentary | E    | 12    | HighFat.Sedentary | HighFat.E | HighFat.12  |
|             | Sedentary.E   | Sedentary.12           | E.12 | HighFat.Sedentary.12 | 5.006   | 17        | 32.7 | 1.413 | NA                | 34628     | Evans.12.19 |
| Evans.12.23 | CCAGGGACTTCT  | CCGGACTACHVGGGTWTCTAAT | 23   | 66                   | HighFat | Sedentary | F    | 12    | HighFat.Sedentary | HighFat.F | HighFat.12  |
|             | Sedentary.F   | Sedentary.12           | F.12 | HighFat.Sedentary.12 | 4.735   | 18.7      | 34.3 | 2.436 | NA                | 33615     | Evans.12.23 |
| Evans.12.4  | TGCTACAGACGT  | CCGGACTACHVGGGTWTCTAAT | 4    | 67                   | HighFat | Exercised | A    | 12    | HighFat.Exercised | HighFat.A | HighFat.12  |
|             | Exercised.A   | Exercised.12           | A.12 | HighFat.Exercised.12 | 5.327   | 17.6      | 24.4 | 0.505 | 685.6             | 21825     | Evans.12.4  |
| Evans.12.8  | GATAGCACTCGT  | CCGGACTACHVGGGTWTCTAAT | 8    | 68                   | HighFat | Exercised | B    | 12    | HighFat.Exercised | HighFat.B | HighFat.12  |
|             | Exercised.B   | Exercised.12           | B.12 | HighFat.Exercised.12 | 5.749   | 18.5      | 27.4 | 0.471 | 2482              | 25043     | Evans.12.8  |
| Evans.12.12 | TCGACCAAACAC  | CCGGACTACHVGGGTWTCTAAT | 12   | 69                   | HighFat | Exercised | C    | 12    | HighFat.Exercised | HighFat.C | HighFat.12  |
|             | Exercised.C   | Exercised.12           | C.12 | HighFat.Exercised.12 | 5.424   | 17.6      | 26   | 0.599 | 1221.6            | 16200     | Evans.12.12 |
| Evans.12.16 | CCGATGCCTTGA  | CCGGACTACHVGGGTWTCTAAT | 16   | 70                   | HighFat | Exercised | D    | 12    | HighFat.Exercised | HighFat.D | HighFat.12  |
|             | Exercised.D   | Exercised.12           | D.12 | HighFat.Exercised.12 | 5.158   | 18.5      | 33.7 | 1.906 | 671.4             | 34845     | Evans.12.16 |
| Evans.12.20 | CAAAGTTTGCGA  | CCGGACTACHVGGGTWTCTAAT | 20   | 71                   | HighFat | Exercised | E    | 12    | HighFat.Exercised | HighFat.E | HighFat.12  |
|             | Exercised.E   | Exercised.12           | E.12 | HighFat.Exercised.12 | 5.253   | 16.8      | 27.2 | 0.704 | 2118.39           | 22433     | Evans.12.20 |
| Evans.12.24 | GCAATCCTTGCG  | CCGGACTACHVGGGTWTCTAAT | 24   | 72                   | HighFat | Exercised | F    | 12    | HighFat.Exercised | HighFat.F | HighFat.12  |
|             | Exercised.F   | Exercised.12           | F.12 | HighFat.Exercised.12 | 5.314   | 18.1      | 28.6 | 0.918 | 1197.7            | 24525     | Evans.12.24 |

```

mkdir 00_rawseqs
cd 00_rawseqs
wget ftp://ftp.igsb.anl.gov/jobs/cc8b5e8e68cedf34099c4063de229bd4/Evans_16S/Undetermined_S0_L001_*.fastq.gz
cd ..

mkdir scripts
wget -q -O scripts/fastq-join https://www.dropbox.com/s/m51lmz4vu9ooc2o/fastq-join?dl=1
wget -q -O scripts/fastq-barcode.pl https://www.dropbox.com/s/hk33ovypzmev938/fastq-barcode.pl?dl=1
wget -q -O scripts/fastq_split.pl https://www.dropbox.com/s/pkqw7sh40nh02q9/fastq_split.pl?dl=1
wget -q -O scripts/ttest_otu_table.pl https://www.dropbox.com/s/tpv8ptppyf03in3/ttest_otu_table.pl?dl=1
chmod a+x scripts/*

mkdir 01_joined
gunzip -c 00_rawseqs/*_L001_I1* > 01_joined/barcodes.fastq
gunzip -c 00_rawseqs/*_L001_R1* > 01_joined/read1.fastq
gunzip -c 00_rawseqs/*_L001_R2* > 01_joined/read2.fastq
./scripts/fastq-join 01_joined/read1.fastq 01_joined/read2.fastq -o 01_joined/out.%.fastq > 01_joined/out.stats.txt
./scripts/fastq-barcode.pl 01_joined/barcodes.fastq 01_joined/out.join.fastq > 01_joined/out.barcodes.fastq

mkdir 02_demult
./scripts/fastq_split.pl -m MappingFile.txt -i 01_joined/out.join.fastq -b 01_joined/out.barcodes.fastq -o 02_demult/seqs.fna

pick_otus.py -i 02_demult/seqs.fna -o 03_otus
perl -nae 'print $_ if (@F - 1 >= 2);' < 03_otus/seqs_otus.txt > 03_otus/filtered_seqs_otus.txt

mkdir 04_rep_set
pick_rep_set.py -i 03_otus/filtered_seqs_otus.txt -f 02_demult/seqs.fna -l 04_rep_set/rep_set.log -o 04_rep_set/rep_set.fasta
assign_taxonomy.py -i 04_rep_set/rep_set.fasta -o 05_taxonomy -t /usr/local/bin/qiime-1.5.0/gg_otus-16oct2012-release/taxonomy/97_rdp_train.txt -r
/usr/local/bin/qiime-1.5.0/gg_otus-16oct2012-release/rep_set/97_otus.fasta

mkdir 06_otu_table
make_otu_table.py -i 03_otus/filtered_seqs_otus.txt -t 05_taxonomy/rep_set_tax_assignments.txt -o 06_otu_table/otu_table.biom

# Call "per_library_stats.py -i 06_otu_table/otu_table.biom" to see what depth to subsample to
single_rarefaction.py -i 06_otu_table/otu_table.biom -o 06_otu_table/otu_table_even.biom -d 1600
sort_otu_table.py -i 06_otu_table/otu_table_even.biom -o 06_otu_table/otu_table_even_sorted.biom -m MappingFile.txt -s Sort
mv 06_otu_table/otu_table_even_sorted.biom 06_otu_table/otu_table_even.biom

align_seqs.py -i 04_rep_set/rep_set.fasta -o 07_aligned_seqs -t /usr/local/bin/qiime-1.5.0/core_set_aligned.fasta.imputed
filter_alignment.py -i 07_aligned_seqs/rep_set_aligned.fasta -o 07_aligned_seqs

mkdir 08_phylogeny
make_phylogeny.py -i 07_aligned_seqs/rep_set_aligned_pfiltered.fasta -o 08_phylogeny/rep_set.tre

beta_diversity_through_plots.py -i 06_otu_table/otu_table_even.biom -t 08_phylogeny/rep_set.tre -m MappingFile.txt -o 09_beta_diversity -a -O 6
make_otu_network.py -m MappingFile.txt -i 06_otu_table/otu_table_even.biom -o 10_otu_network
summarize_taxa_through_plots.py -i 06_otu_table/otu_table_even.biom -o 11_taxa_summary -m MappingFile.txt

echo "alpha_diversity:metrics shannon,PD_whole_tree,chaol,observed_species" > alpha_params.txt
alpha_rarefaction.py -i 06_otu_table/otu_table.biom -m MappingFile.txt -o 12_alpha_rarefaction -p alpha_params.txt -t 08_phylogeny/rep_set.tre

jackknifed_beta_diversity.py -i 06_otu_table/otu_table_even.biom -t 08_phylogeny/rep_set.tre -m MappingFile.txt -o 13_jackknifed_bdiv -e 1000
make_bootstrapped_tree.py -m 13_jackknifed_bdiv/unweighted_unifrac/upgma_cmp/master_tree.tre -s
13_jackknifed_bdiv/unweighted_unifrac/upgma_cmp/jackknife_support.txt -o 13_jackknifed_bdiv/unweighted_unifrac/upgma_cmp/jackknife_named_nodes.pdf
make_bootstrapped_tree.py -m 13_jackknifed_bdiv/weighted_unifrac/upgma_cmp/master_tree.tre -s
13_jackknifed_bdiv/weighted_unifrac/upgma_cmp/jackknife_support.txt -o 13_jackknifed_bdiv/weighted_unifrac/upgma_cmp/jackknife_named_nodes.pdf

./scripts/ttest_otu_table.pl -i 06_otu_table/otu_table_even.biom -m MappingFile.txt -o 18_ttest_otu_table -r 1600 -p Mouse -x "NA" -t 80 -n

# Discrete Variables:
mkdir 15_boxplots
mkdir 16_otu_cat_sig

```

```

mkdir 17_compare_cat
for f in Mouse Diet Lifestyle Litter Week Diet.LifeStyle Diet.Litter Diet.Week LifeStyle.Litter LifeStyle.Week Litter.Week Diet.LifeStyle.Week
do
    make_distance_boxplots.py -d 09_beta_diversity/unweighted_unifrac_dm.txt -m MappingFile.txt -o 15_boxplots --height 12 -f $f --sort

    otu_category_significance.py -i 06_otu_table/otu_table_even.biom -m MappingFile.txt -s ANOVA -o
16_otu_cat_sig/anova_All.By.$f.txt -c $f
    otu_category_significance.py -i 06_otu_table/otu_table_even.biom -m MappingFile.txt -s g_test -o
16_otu_cat_sig/gtest_All.By.$f.txt -c $f
    compare_categories.py -i 09_beta_diversity/unweighted_unifrac_dm.txt -m MappingFile.txt --method adonis -o 17_compare_cat/adonis_All.By.$f
-c $f
    compare_categories.py -i 09_beta_diversity/unweighted_unifrac_dm.txt -m MappingFile.txt --method anosim -o 17_compare_cat/anosim_All.By.$f
-c $f
    compare_categories.py -i 09_beta_diversity/unweighted_unifrac_dm.txt -m MappingFile.txt --method mrpp -o 17_compare_cat/mrpp_All.By.$f
-c $f
    compare_categories.py -i 09_beta_diversity/unweighted_unifrac_dm.txt -m MappingFile.txt --method permdisp -o
17_compare_cat/permdisp_All.By.$f -c $f
    compare_categories.py -i 09_beta_diversity/unweighted_unifrac_dm.txt -m MappingFile.txt --method rda -o 17_compare_cat/rda_All.By.$f
-c $f
done

```

```

mkdir 14_subgroups
# Mouse Diet Lifestyle Litter Week Diet.LifeStyle Diet.Litter Diet.Week LifeStyle.Litter LifeStyle.Week Litter.Week Diet.LifeStyle.Week

# Subdivide on Diet
export v='Diet'
mkdir 14_subgroups/$v
mkdir 14_subgroups/$v/Stats
mkdir 14_subgroups/$v/TTests
for c in LowFat HighFat
do
    filter_samples_from_otu_table.py -i 06_otu_table/otu_table_even.biom -o 14_subgroups/$v/$c.biom -m MappingFile.txt --output_mapping_fp
14_subgroups/$v/$c.map -s "$v:$c"
    sort_otu_table.py -i 14_subgroups/$v/$c.biom -o 14_subgroups/$v/$c.biom.sorted -m 14_subgroups/$v/$c.map -s Week
    mv 14_subgroups/$v/$c.biom.sorted 14_subgroups/$v/$c.biom
    beta_diversity_through_plots.py -i 14_subgroups/$v/$c.biom -t 08_phylogeny/rep_set.tre -m 14_subgroups/$v/$c.map -o 14_subgroups/$v/BetaDiversity_$c
--suppress_3d_plots -a -O 6
    summarize_taxa_through_plots.py -i 14_subgroups/$v/$c.biom -m 14_subgroups/$v/$c.map -o 14_subgroups/$v/TaxaSummaryBarPlots_$c

    ./scripts/ttest_otu_table.pl -i 14_subgroups/$v/$c.biom -m 14_subgroups/$v/$c.map -o 14_subgroups/$v/TTests/$c -r 1600 -p Mouse -x "NA" -t 80 -n

for f in Mouse Lifestyle Litter Week LifeStyle.Litter LifeStyle.Week Litter.Week
do
    make_distance_boxplots.py -d 14_subgroups/$v/BetaDiversity_$c/unweighted_unifrac_dm.txt -m 14_subgroups/$v/$c.map -o
14_subgroups/$v/BoxPlots_$c --height 12 -f $f --sort

    otu_category_significance.py -i 14_subgroups/$v/$c.biom -m 14_subgroups/$v/$c.map -s ANOVA -o
14_subgroups/$v/Stats/anova_$c.By.$f.txt -c $f
    otu_category_significance.py -i 14_subgroups/$v/$c.biom -m 14_subgroups/$v/$c.map -s g_test -o
14_subgroups/$v/Stats/gtest_$c.By.$f.txt -c $f
    compare_categories.py -i 14_subgroups/$v/BetaDiversity_$c/unweighted_unifrac_dm.txt -m 14_subgroups/$v/$c.map --method adonis -o
14_subgroups/$v/Stats/adonis_$c.By.$f -c $f
    compare_categories.py -i 14_subgroups/$v/BetaDiversity_$c/unweighted_unifrac_dm.txt -m 14_subgroups/$v/$c.map --method anosim -o
14_subgroups/$v/Stats/anosim_$c.By.$f -c $f
    compare_categories.py -i 14_subgroups/$v/BetaDiversity_$c/unweighted_unifrac_dm.txt -m 14_subgroups/$v/$c.map --method mrpp -o
14_subgroups/$v/Stats/mrpp_$c.By.$f -c $f
    compare_categories.py -i 14_subgroups/$v/BetaDiversity_$c/unweighted_unifrac_dm.txt -m 14_subgroups/$v/$c.map --method permdisp -o
14_subgroups/$v/Stats/permdisp_$c.By.$f -c $f

```

```

        compare_categories.py -i 14_subgroups/$v/BetaDiversity_$c/unweighted_unifrac_dm.txt -m 14_subgroups/$v/$c.map --method rda -o
14_subgroups/$v/Stats/rda_$c.By.$f -c $f
    done
done

# Subdivide on Lifestyle
export v='Lifestyle'
mkdir 14_subgroups/$v
mkdir 14_subgroups/$v/Stats
mkdir 14_subgroups/$v/TTests
for c in Sedentary Exercised
do
    filter_samples_from_otu_table.py -i 06_otu_table/otu_table_even.biom -o 14_subgroups/$v/$c.biom -m MappingFile.txt --output_mapping_fp
14_subgroups/$v/$c.map -s "$v:$c"
    sort_otu_table.py -i 14_subgroups/$v/$c.biom -o 14_subgroups/$v/$c.biom.sorted -m 14_subgroups/$v/$c.map -s Week
    mv 14_subgroups/$v/$c.biom.sorted 14_subgroups/$v/$c.biom
    beta_diversity_through_plots.py -i 14_subgroups/$v/$c.biom -t 08_phylogeny/rep_set.tre -m 14_subgroups/$v/$c.map -o 14_subgroups/$v/BetaDiversity_$c
--suppress_3d_plots -a -O 6
    summarize_taxa_through_plots.py -i 14_subgroups/$v/$c.biom -m 14_subgroups/$v/$c.map -o 14_subgroups/$v/TaxaSummaryBarPlots_$c

    ./scripts/ttest_otu_table.pl -i 14_subgroups/$v/$c.biom -m 14_subgroups/$v/$c.map -o 14_subgroups/$v/TTests/$c -r 1600 -p Mouse -x "NA" -t 80 -n

for f in Mouse Diet Litter Week Diet.Litter Diet.Week Litter.Week
do
    make_distance_boxplots.py -d 14_subgroups/$v/BetaDiversity_$c/unweighted_unifrac_dm.txt -m 14_subgroups/$v/$c.map -o
14_subgroups/$v/BoxPlots_$c --height 12 -f $f --sort

    otu_category_significance.py -i 14_subgroups/$v/$c.biom -m 14_subgroups/$v/$c.map -s ANOVA -o
14_subgroups/$v/Stats/anova_$c.By.$f.txt -c $f
    otu_category_significance.py -i 14_subgroups/$v/$c.biom -m 14_subgroups/$v/$c.map -s g_test -o
14_subgroups/$v/Stats/gtest_$c.By.$f.txt -c $f
    compare_categories.py -i 14_subgroups/$v/BetaDiversity_$c/unweighted_unifrac_dm.txt -m 14_subgroups/$v/$c.map --method adonis -o
14_subgroups/$v/Stats/adonis_$c.By.$f -c $f
    compare_categories.py -i 14_subgroups/$v/BetaDiversity_$c/unweighted_unifrac_dm.txt -m 14_subgroups/$v/$c.map --method anosim -o
14_subgroups/$v/Stats/anosim_$c.By.$f -c $f
    compare_categories.py -i 14_subgroups/$v/BetaDiversity_$c/unweighted_unifrac_dm.txt -m 14_subgroups/$v/$c.map --method mrpp -o
14_subgroups/$v/Stats/mrpp_$c.By.$f -c $f
    compare_categories.py -i 14_subgroups/$v/BetaDiversity_$c/unweighted_unifrac_dm.txt -m 14_subgroups/$v/$c.map --method permdisp -o
14_subgroups/$v/Stats/permdisp_$c.By.$f -c $f
    compare_categories.py -i 14_subgroups/$v/BetaDiversity_$c/unweighted_unifrac_dm.txt -m 14_subgroups/$v/$c.map --method rda -o
14_subgroups/$v/Stats/rda_$c.By.$f -c $f
    done
done

# Subdivide on Week
export v='Week'
mkdir 14_subgroups/$v
mkdir 14_subgroups/$v/Stats
mkdir 14_subgroups/$v/TTests
for c in 1 7 12
do
    filter_samples_from_otu_table.py -i 06_otu_table/otu_table_even.biom -o 14_subgroups/$v/$c.biom -m MappingFile.txt --output_mapping_fp
14_subgroups/$v/$c.map -s "$v:$c"
    sort_otu_table.py -i 14_subgroups/$v/$c.biom -o 14_subgroups/$v/$c.biom.sorted -m 14_subgroups/$v/$c.map -s Week
    mv 14_subgroups/$v/$c.biom.sorted 14_subgroups/$v/$c.biom
    beta_diversity_through_plots.py -i 14_subgroups/$v/$c.biom -t 08_phylogeny/rep_set.tre -m 14_subgroups/$v/$c.map -o 14_subgroups/$v/BetaDiversity_$c
--suppress_3d_plots -a -O 6
    summarize_taxa_through_plots.py -i 14_subgroups/$v/$c.biom -m 14_subgroups/$v/$c.map -o 14_subgroups/$v/TaxaSummaryBarPlots_$c

    ./scripts/ttest_otu_table.pl -i 14_subgroups/$v/$c.biom -m 14_subgroups/$v/$c.map -o 14_subgroups/$v/TTests/$c -r 1600 -p Mouse -x "NA" -t 80 -n

for f in Mouse Diet Lifestyle Litter Diet.LifeStyle Diet.Litter LifeStyle.Litter

```

```

do
    make_distance_boxplots.py -d 14_subgroups/$v/BetaDiversity_$c/unweighted_unifrac_dm.txt -m 14_subgroups/$v/$c.map -o
14_subgroups/$v/BoxPlots_$c --height 12 -f $f --sort

    otu_category_significance.py -i 14_subgroups/$v/$c.biom -m 14_subgroups/$v/$c.map -s ANOVA -o
14_subgroups/$v/Stats/anova_$c.By.$f.txt -c $f
    otu_category_significance.py -i 14_subgroups/$v/$c.biom -m 14_subgroups/$v/$c.map -s g_test -o
14_subgroups/$v/Stats/gtest_$c.By.$f.txt -c $f
    compare_categories.py -i 14_subgroups/$v/BetaDiversity_$c/unweighted_unifrac_dm.txt -m 14_subgroups/$v/$c.map --method adonis -o
14_subgroups/$v/Stats/adonis_$c.By.$f -c $f
    compare_categories.py -i 14_subgroups/$v/BetaDiversity_$c/unweighted_unifrac_dm.txt -m 14_subgroups/$v/$c.map --method anosim -o
14_subgroups/$v/Stats/anosim_$c.By.$f -c $f
    compare_categories.py -i 14_subgroups/$v/BetaDiversity_$c/unweighted_unifrac_dm.txt -m 14_subgroups/$v/$c.map --method mrpp -o
14_subgroups/$v/Stats/mrpp_$c.By.$f -c $f
    compare_categories.py -i 14_subgroups/$v/BetaDiversity_$c/unweighted_unifrac_dm.txt -m 14_subgroups/$v/$c.map --method permdisp -o
14_subgroups/$v/Stats/permdisp_$c.By.$f -c $f
    compare_categories.py -i 14_subgroups/$v/BetaDiversity_$c/unweighted_unifrac_dm.txt -m 14_subgroups/$v/$c.map --method rda -o
14_subgroups/$v/Stats/rda_$c.By.$f -c $f
done

```

This file contains the computer commands used in the analysis of the sequencing dataset for the QIIME 1.5.0 software suite.[1] The reads from samples were clustered at 97% sequence identity into operational taxonomic units (OTUs) then aligned to the October 12th, 2012 Greengenes bacterial reference tree.[2] Please see the Bioinformatics section of the Methods for details.

#### Bibliography:

1. Caporaso JG, Kuczynski J, Stombaugh J, Bittinger K, Bushman FD, et al. (2010) QIIME allows analysis of high-throughput community sequencing data. *Nature Methods* 7: 335-336.
2. DeSantis TZ, Hugenholtz P, Larsen N, Rojas M, Brodie EL, et al. (2006) Greengenes, a chimera-checked 16S rRNA gene database and workbench compatible with ARB. *Applied and environmental microbiology* 72: 5069-5072.
